# Supplementary material
Source: PubMed Central journal article supplement (PMC3457191)
Supplement: JB.00899-12_zjb999091968so1.pdf [file JB.00899-12_zjb999091968so1.pdf]

## Supplementary Information

**Supplementary Table 1. Primers used in this study**

| Primer name       | Primer sequence (5'-3') <sup>a</sup>                      |
|-------------------|-----------------------------------------------------------|
| <i>fimU</i> KO-1  | tgtaaaacgacggccagtgccaagcttgcctgGTCCAGGTCCAGCCAGTACAG     |
| <i>fimU</i> KO-2  | GTTGCTTTGAAGATGGGTACAGGCTGCGACAAATAGAGCGCATG              |
| <i>fimU</i> KO-3  | CATGCGCTCTATTTGTGCGAGCCTGTACCCATCTTCAAAGCAA C             |
| <i>fimU</i> KO-4  | ccatgattacgaattcgagctcggtaccgggatccTAGGTAGACCAG GCGAACGAC |
| <i>pilV</i> KO-1  | tgtaaaacgacggccagtgccaagcttgcctgAGCCGTGCTACTCGTGACAGC     |
| <i>pilV</i> KO-2  | CAAGGTGGAGTCAGAGGCGTTAACCAGTACTTCGATCATGCTG               |
| <i>pilV</i> KO-3  | CAGCATGATCGAAGTACTGGTTAACGCCTCTGACTCCACCTTG               |
| <i>pilV</i> KO-4  | ccatgattacgaattcgagctcggtaccgggatccCGCTTCTGTTTCGATGAGATTG |
| <i>pilW</i> KO-1  | tgtaaaacgacggccagtgccaagcttgcctgAGTTTCAACGCCTTGATCGAG     |
| <i>pilW</i> KO-2  | GCTCTCGGGATAAAGGACGATGTAGATCTGGCTGATCCCCAG                |
| <i>pilW</i> KO-3  | CTGGGGATCAGCCAGATCTACATCGTCCTTTATCCCGAGAGC                |
| <i>pilW</i> KO-4  | ccatgattacgaattcgagctcggtaccgggatccTCGCCTGACAGTGTC AATTC  |
| <i>pilX</i> KO-1  | tgtaaaacgacggccagtgccaagcttgcctgTGCGACAACACCAAAGGCTCG     |
| <i>pilX</i> KO-2  | GCTGTTGGTTTCGTAGTAGAAGATACGGCTTTCAGTGACAC                 |
| <i>pilX</i> KO-3  | GTGTC ACTGGAAAGCCGTATCTTCTACTACGAAACCAACAGC               |
| <i>pilX</i> KO-4  | ccatgattacgaattcgagctcggtaccgggatccTTCCGTCTTCGGTGGTATAAG  |
| <i>pilY2</i> KO-1 | tgtaaaacgacggccagtgccaagcttgcctgTGGCTGATA ACAACAGCGATG    |
| <i>pilY2</i> KO-2 | CTCCGATCCGAAGGGAACGAGAGCTGTGGCGAGAAGACGTAAG               |
| <i>pilY2</i> KO-3 | CTTACGTCTTCTCGCCACAGCTCTCGTTCCTTCGGATCGGAG                |
| <i>pilY2</i> KO-4 | ccatgattacgaattcgagctcggtaccgggatccCGAAGCCCTGCACTACGTGAC  |
| <i>pilE</i> KO-1  | tgtaaaacgacggccagtgccaagcttgcctgTACCTTGGTACGCCATCCTAG     |
| <i>pilE</i> KO-2  | GCTCTTCTTGCTTCCAGTCCGCATTGTTGCTGCTCCGATCCG                |

*pilE* KO-3 CGGATCGGAGCAGCAACAATGCGGACTGGAAGCAAGAAGAGC  
*pilE* KO-4 ccatgattacgaattcgagctcgggtaccgggatccACCGCCATGCAAATCAAACCTC  
*pilD* KO-1 tgtaaacgacggccagtgccaagcttgcctgCTCGGCAGATGTCTACCATGATG  
*pilD* KO-2 GAATTGCAGATAGGTCCGGGTAAGGAGGATGGCGCACAAGAC  
*pilD* KO-3 GTCTTGTGCGCCATCCTCCTTACCCGGACCTATCTGCAATC  
*pilD* KO-4 ccatgattacgaattcgagctcgggtaccgggatccGAGTTGCTGTCTGAAGAGCGAC  
*fimU-pilE* KO-1 tgtaaacgacggccagtgccaagcttgcctgACCGATATAGGGGATGCCTTC  
*fimU-pilE* KO-2 GCTCTTCTTGCTTCCAGTCCGATGAATACCTCTGCGGGTATG  
*fimU-pilE* KO-3 CATAACCGCAGAGGTATTCATCGGACTGGAAGCAAGAAGAGC  
*fimU-pilE* KO-4 See *pilE* KO-4  
*pilW* comp 5' caactcttactgtttctccatacccgttttttggggaaggagatatacatGTGAGAACAAGCATGCT  
CTTC  
*pilW* comp 3' taatctgtatcaggctgaaaatcttctctcatccgccTCAgtggtgatggtggtgTGGCATGAGATT  
CCTGATGG  
*pilX* comp 5' ttctccatacccgttttttggggaaggagatatacatATGACCCTGCGCCATACCTC  
*pilX* comp 3' atcttctctcatccgccTCAgtggtgatggtggtgGTTGGTATAACAGGCGTGCATG  
*pilX* (G-1A) For CCATACCTCTCGACAGCAGGCCTCCACGTTGTTGATCTCGCTG  
*pilX* (G-1A) Rev CAGCGAGATCAACAACGTGGAGGCCTGCTGTCGAGAGGTATGG  
*pilX* (G-1D) For CCATACCTCTCGACAGCAGGATTCCACGTTGTTGATCTCGCTG  
*pilX* (G-1D) Rev CAGCGAGATCAACAACGTGGAATCCTGCTGTCGAGAGGTATGG  
*pilX* (G-1F) For CCATACCTCTCGACAGCAGTTCTCCACGTTGTTGATCTCGCTG  
*pilX* (G-1F) Rev CAGCGAGATCAACAACGTGGAGAACTGCTGTCGAGAGGTATGG  
*pilW* (G-1F) For CTTACGCAAAAATGCAGAAATTCCTATCGATGGTAGAACTGCTC  
*pilW* (G-1F) Rev GCAGTTCTACCATCGATAGGAATTTCTGCATTTTGCTGAAGAG  
*pilX* KI 5' ttcccagtcacgagcttgtaaacgacggccagtgccCTACATTTGTCTGCAGCCCAAC

*pilX* KI 3'            aacaatttcacacaggaaacagctatgaccatgattacTTGCTCAGGTTGGTGGTGGAG  
*pilX* KI.2 3'            aacaatttcacacaggaaacagctatgaccatgattacGGTCTGGTTCTGGTTGTCGAG  
*pilX* His KI For        TGTATACCAACcaccaccaccatcaccacTGACTGGAGCCAGCGCATGATC  
*pilX* His KI Rev        GGCTCCAGTCAgtggtgatggtggtggtgGTTGGTATACAGGCGTGCATG  
*pilX*ΔLP For            CAAACCATCAGGAATCTCATGCCATGAGCACGTTGTTGATCTCGCTG  
*pilX*ΔLP Rev            CAGCGAGATCAACAACGTGGACATGGCATGAGATTCTGATGGTTTG

<sup>a</sup>Lowercase letters indicate sequence homology to the cloning vector, uppercase letters indicate a *Pseudomonas*-specific gene sequence, lowercase underlined letters indicate a His epitope tag sequence, lowercase italics indicate ribosome binding site, bold-face letters indicate codon mutations.

# Supp. Fig. 1

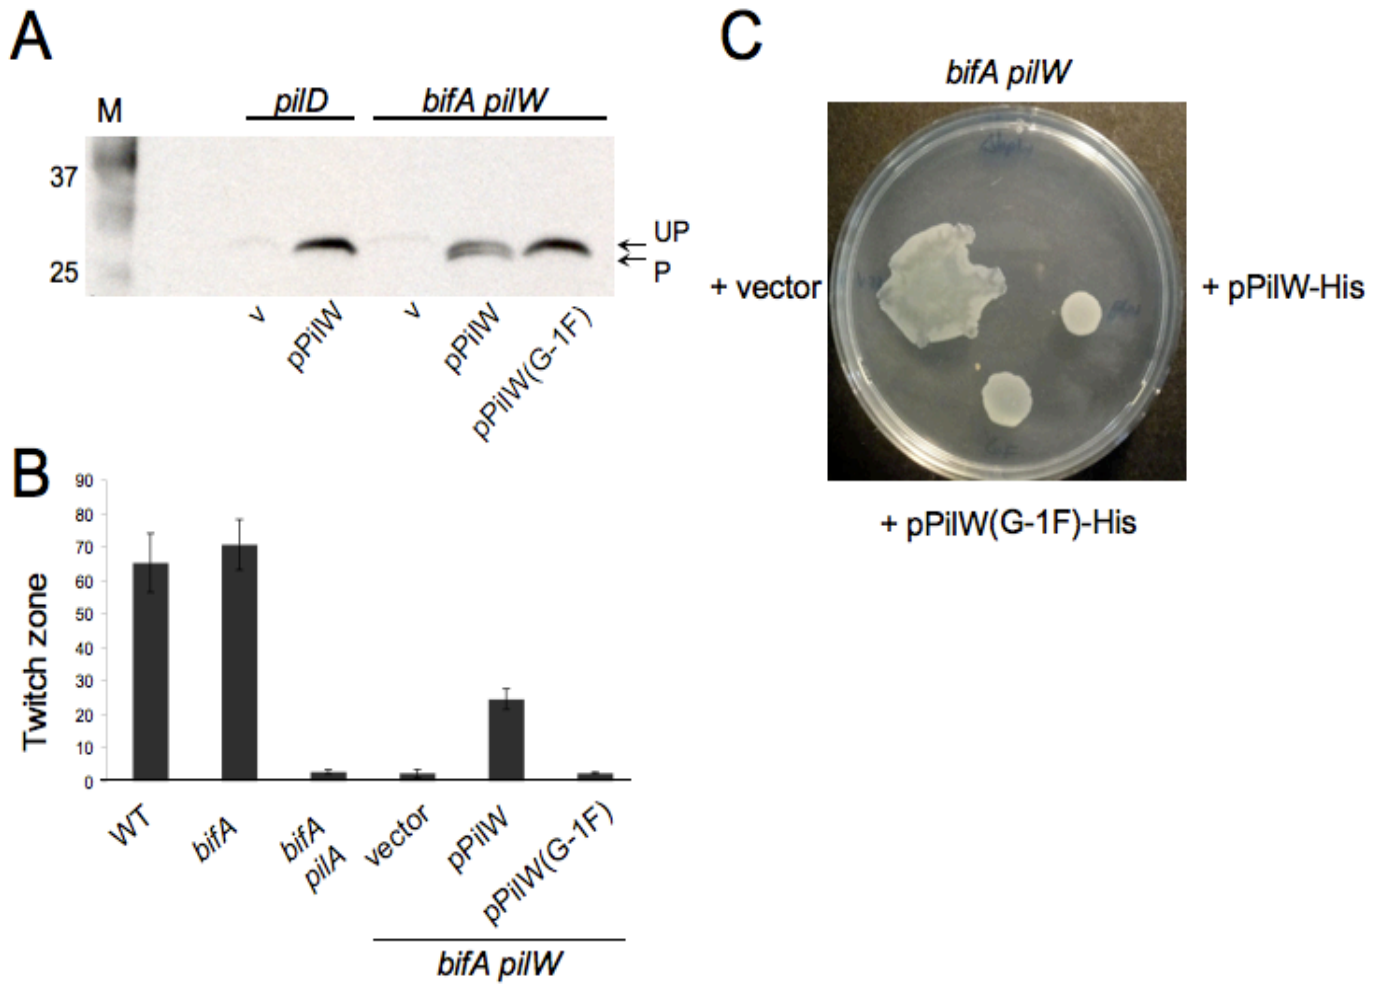

**Supplemental Fig. 1. Analysis of PilW.** **A.** Western blot showing plasmid-based expression and PilD-mediated processing status of the PilW-His and PilW(G-1F)-His proteins in the *pilD* and *bifA pilW* mutant backgrounds. Equal amounts of total protein from whole cell lysates prepared from each strain were resolved by SDS/PAGE on a 15% polyacrylamide gel. PilW-His and the PilW(G-1F)-His mutant variant were detected using an anti-penta-His antibody. The protein size markers (M) are indicated in kDa. P, processed form; UP, unprocessed form. **B.** Graph depicting quantification of twitch zones for the indicated strains, measured using ImageJ (units are pixels x 1000). Error bars represent standard deviation of averages from three plates. **C.** Representative image of a swarm plate showing swarms of the *bifA pilW* mutant carrying either vector (left), pPilW-His (right) or pPilW(G-1F)-His (bottom). Swarm medium was supplemented with 0.2 % arabinose and plates were grown at 37°C for 16h.

## Supp. Fig. 2

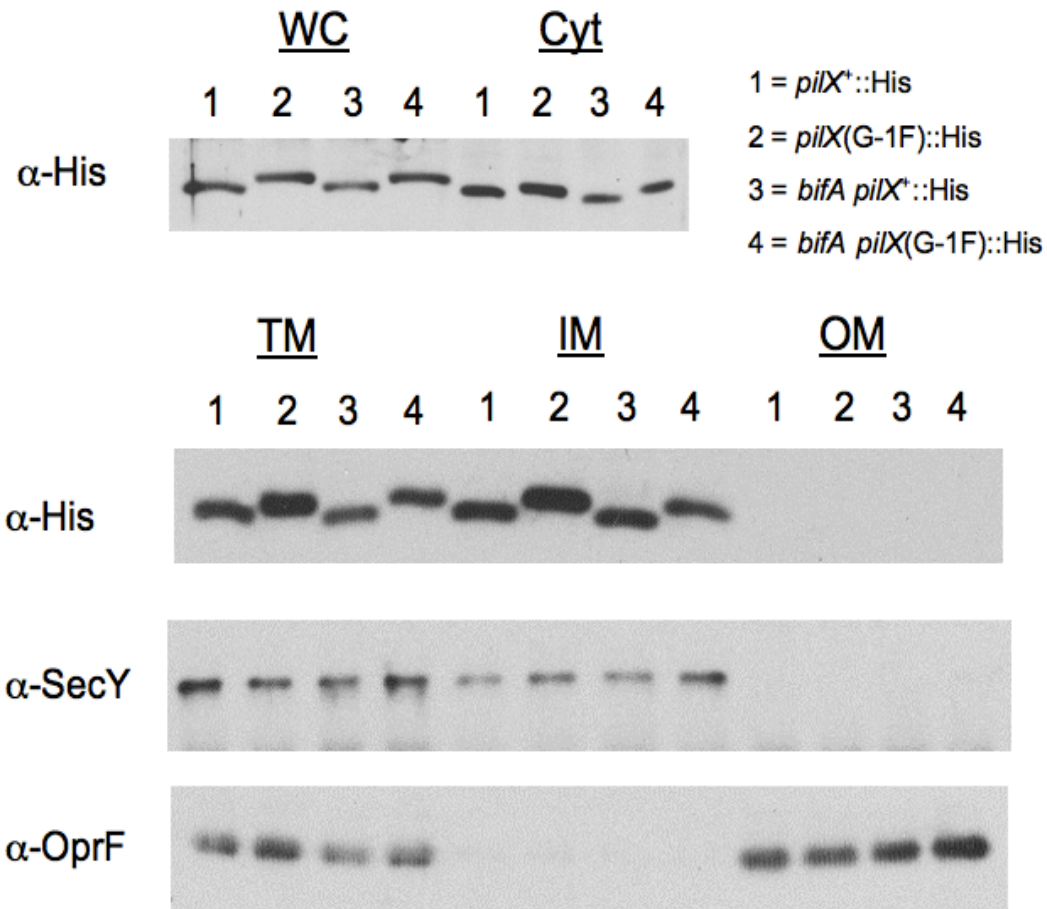

**Supplemental Fig. 2. Cellular localization of the PilX protein in the WT and *bifA* mutant backgrounds.** Western blots showing abundance of chromosomally expressed PilX-His and PilX(G-1F)-His in the cellular fractions depicted as follows: WC, whole cell lysate; Cyt, cytosolic; TM, total membrane; IM, inner membrane; and OM, outer membrane. Lane designations are indicated in the upper right corner. Western blots were probed with one of the following antibodies, as indicated: anti-His antibody to detect PilX-His; anti-SecY antibody to detect the inner membrane-localized SecY protein and anti-OprF antibody to detect the outer membrane-localized OprF protein.

## Supp. Fig. 3

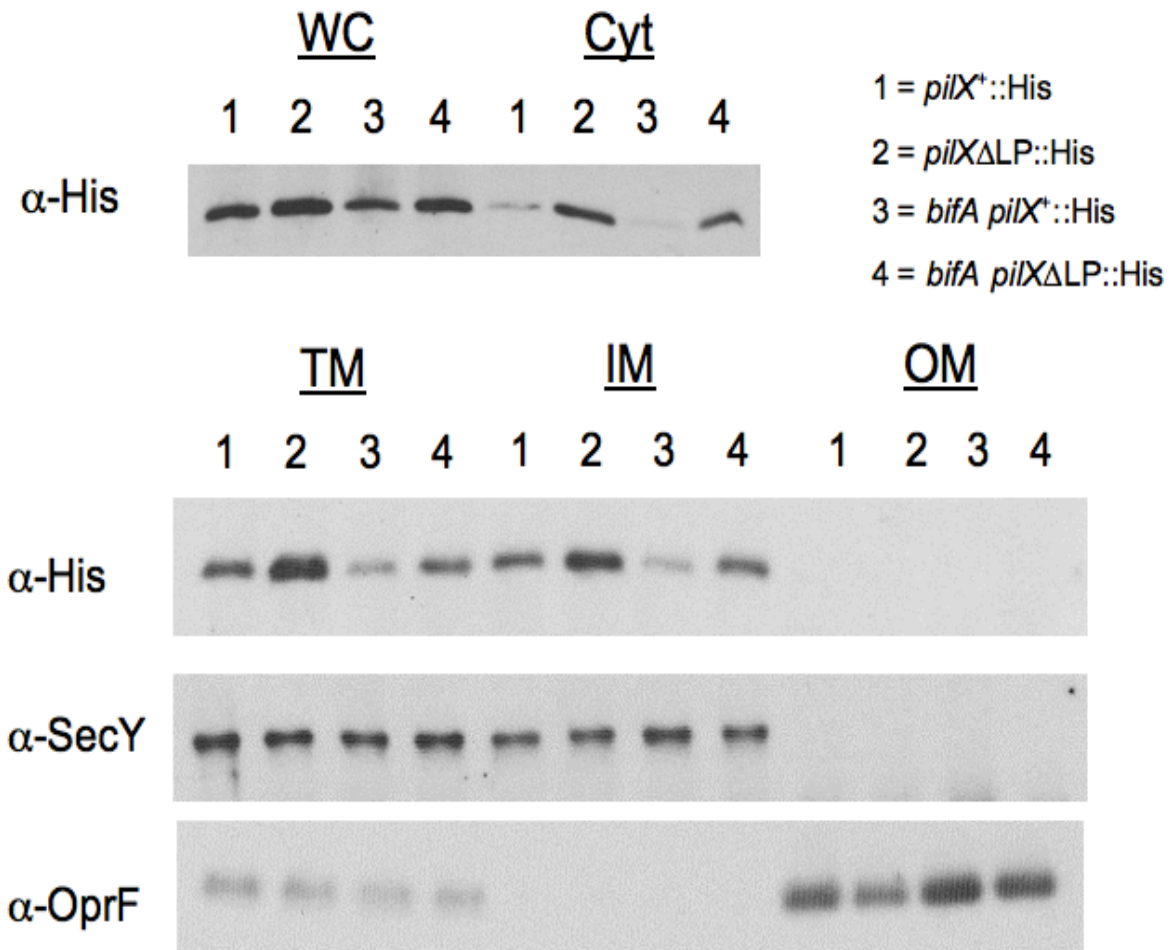

**Supplemental Fig. 3. Cellular localization of the PilXΔLP protein.** Western blots showing abundance of chromosomally expressed PilX-His and PilXΔLP-His in the cellular fractions of the WT and *bifA* strains when grown on swarm plates. Fractions are as follows: WC, whole cell lysate; Cyt, cytosolic; TM, total membrane; IM, inner membrane; and OM, outer membrane. Lane designations are indicated in the upper right corner. Western blots were probed with one of the following antibodies, as indicated: anti-His antibody to detect PilX-His; anti-SecY antibody to detect the inner membrane-localized SecY protein, and anti-OprF antibody to detect the outer membrane-localized OprF protein.
